# Supplementary material for: Structural and functional analysis of the MutS C-terminal tetramerization domain
Source: PubMed Central journal article supplement — Nucleic Acids Res. 2006 Sep 29;34(18):5270–9. doi: 10.1093/nar/gkl489 (PMC1636413; doi:10.1093/nar/gkl489), 2006-09-29
Supplement: nar_gkl489_1.pdf [file nar_gkl489_1.pdf]

## Supporting Table I

*In vivo mismatch repair activity of MutS variants*

| Variant                    | <i>In vivo activity</i> |                      |                |
|----------------------------|-------------------------|----------------------|----------------|
|                            | Median <sup>a</sup>     | Average <sup>b</sup> | n <sup>c</sup> |
| Vector ( <i>mutS</i> null) | 267                     | 290 (243-338)        | 27             |
| MutS <sup>wt</sup>         | 2.5                     | 4.1 (2.1-6.2)        | 16             |
| MutS <sup>CF</sup>         | 3                       | 5.6 (3.0-8.3)        | 31             |
| MutS <sup>CF/D835R</sup>   | 19.5                    | 24 (18-30)           | 23             |
| MutS800 <sup>CF</sup>      | 30                      | 49 (26-73)           | 23             |
| MutS-CTD                   | 223                     | 244 (157-331)        | 11             |

For *in vivo* activity *rpoB* mutation assay was used (see Materials and Methods for details).

<sup>a</sup>Median number of rifampicin-resistant clones that arise by spontaneous mutation.

<sup>b</sup>average number of rifampicin-resistant clones (95 % confidence limits in parenthesis).

<sup>c</sup>number of independent cultures
